# Supplementary material
Source: MDPI journal article supplement (https://www.mdpi.com/2071-1050/15/10/8117)
Supplement: s1 [file s1]

**Table S1.** Contact angle ( $\alpha$ ) measurements of coated stones after oven ageing cycles.

| Samples | $\alpha$ (°) |             |            |            |
|---------|--------------|-------------|------------|------------|
|         | Unaged       | 12 days     | 25 days    | 35 days    |
| LSPB    | 91 $\pm$ 3   | 87 $\pm$ 2  | 80 $\pm$ 2 | 76 $\pm$ 3 |
| ASPB    | 111 $\pm$ 5  | 104 $\pm$ 3 | 91 $\pm$ 2 | 87 $\pm$ 1 |

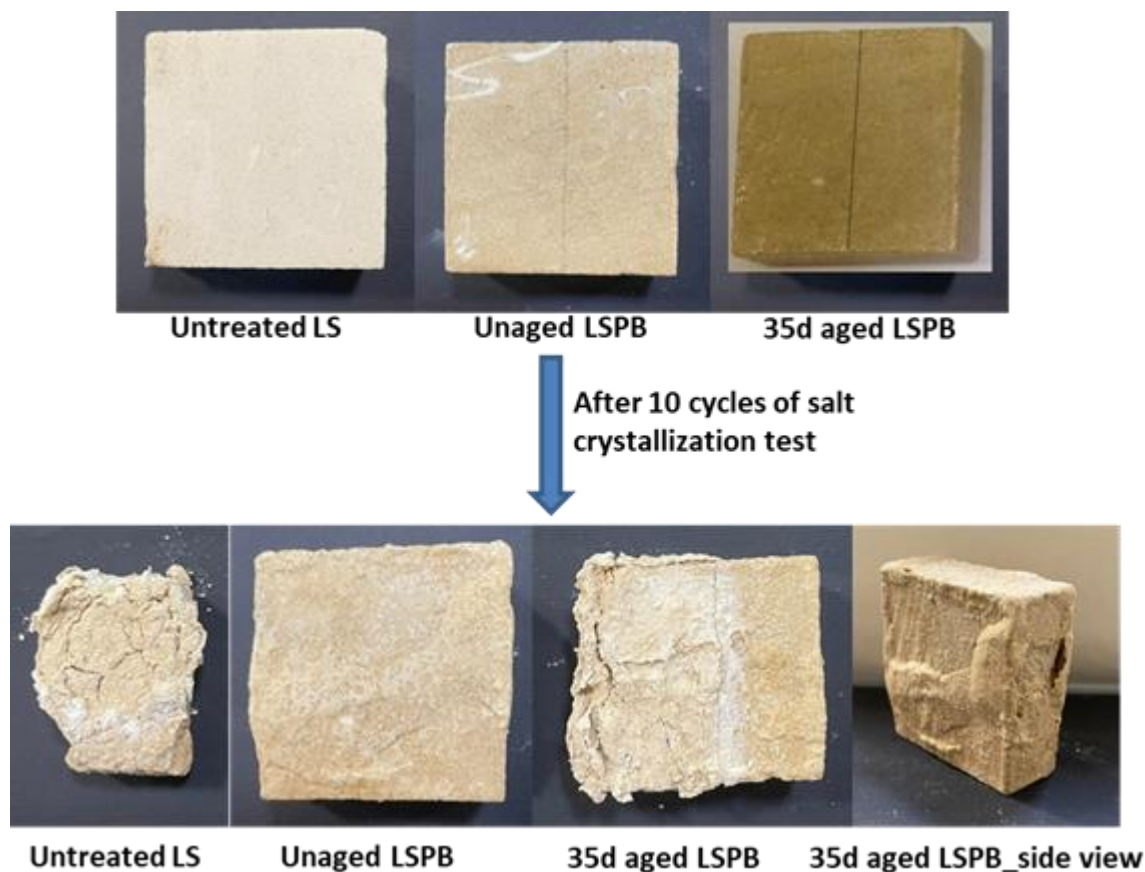**Figure S1.** Different samples of LS before and after salt crystallization test.**Table S2.** The dissolving efficiency of organic solvents towards Paraloid B-72 polymer on glass supports.

| Cleaning agent | Unaged        |       | 12d aged          |       | 25d aged          |       | 35d aged          |       |
|----------------|---------------|-------|-------------------|-------|-------------------|-------|-------------------|-------|
|                | Appear.       | Remo. | Appear.           | Remo. | Appear.           | Remo. | Appear.           | Remo. |
| Ethyl acetate  | Dewetted      | ✓     | Dewetted          | ✓     | Dewetted          | ✓     | Dewetted          | ✓     |
| 2-Butanone     | Dewetted      | ✓     | Dewetted          | ✓     | Dewetted          | ✓     | Dewetted          | ✓     |
| Butyl acetate  | Dewetted      | ✓     | Dewetted          | ✓     | Dewetted          | ✓     | Partially swollen | ±     |
| 2-Butanol      | Swollen       | ±     | Partially swollen | ±     | Partially swollen | ±     | Partially swollen | ±     |
| Water          | No change     | ×     | No change         | ×     | No change         | ×     | No change         | ×     |
| Ethanol        | Colour change | ×     | Colour change     | ×     | Colour change     | ×     | Colour change     | ×     |

**Table S3.** The dissolving efficiency of organic solvents towards Paraloid B-72 polymer on LS and AS specimens.

| Cleaning agent | Unaged        |       | 12d aged          |       | 25d aged          |       | 35d aged          |       |
|----------------|---------------|-------|-------------------|-------|-------------------|-------|-------------------|-------|
|                | Appear.       | Remo. | Appear.           | Remo. | Appear.           | Remo. | Appear.           | Remo. |
| Ethyl acetate  | Dewetted      | ✓     | Dewetted          | ✓     | Dewetted          | ✓     | Dewetted          | ✓     |
| 2-Butanone     | Dewetted      | ✓     | Dewetted          | ✓     | Dewetted          | ✓     | Dewetted          | ✓     |
| Butyl acetate  | Dewetted      | ✓     | Dewetted          | ✓     | Dewetted          | ✓     | Partially swollen | ±     |
| 2-Butanol      | Swollen       | ±     | Partially swollen | ±     | Partially swollen | ±     | Partially swollen | ±     |
| Water          | No change     | ×     | No change         | ×     | No change         | ×     | No change         | ×     |
| Ethanol        | Colour change | ×     | Colour change     | ×     | Colour change     | ×     | Colour change     | ×     |

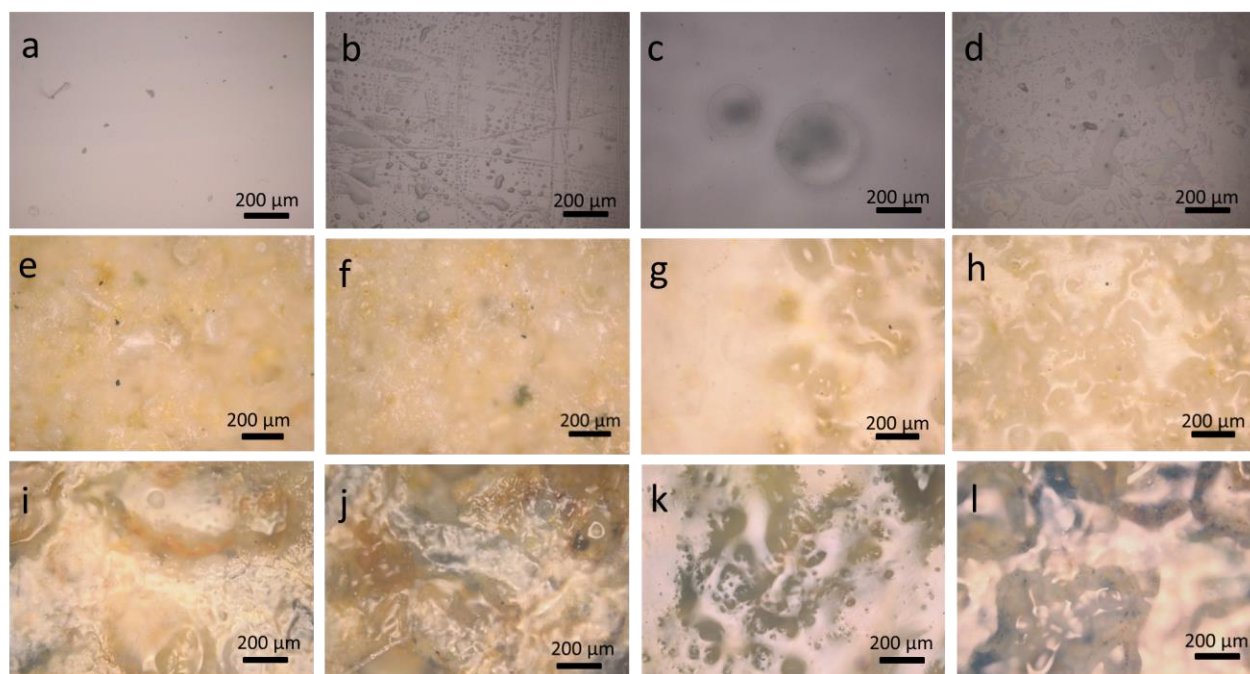

**Figure S2.** Unaged, and 35d aged polymer coated samples before, and after cleaning with EcoSurf-H<sub>2</sub>O, respectively: (a,b) unaged glass samples; (c,d) 35d aged glass samples; (e,f) unaged LS; (g,h) 35d aged LS; (i,j) unaged AS; (k,l) 35d aged AS.

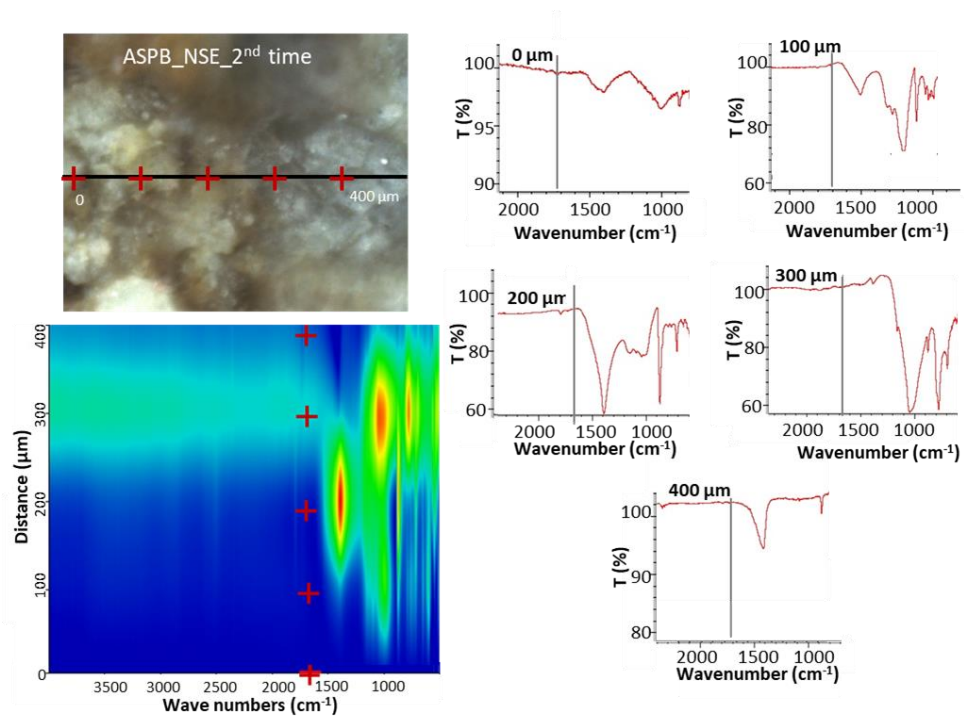

**Figure S3.** Micro-FTIR (ATR mode) mapping on cleaned surfaces of AS.
